# Supplementary figures and images for: Extending Participatory Sensing to Personal Exposure Using Microscopic Land Use Regression Models
Source: MDPI journal article supplement (doi:10.3390/ijerph14060586), 2017-05-31

## Person-Day external validation

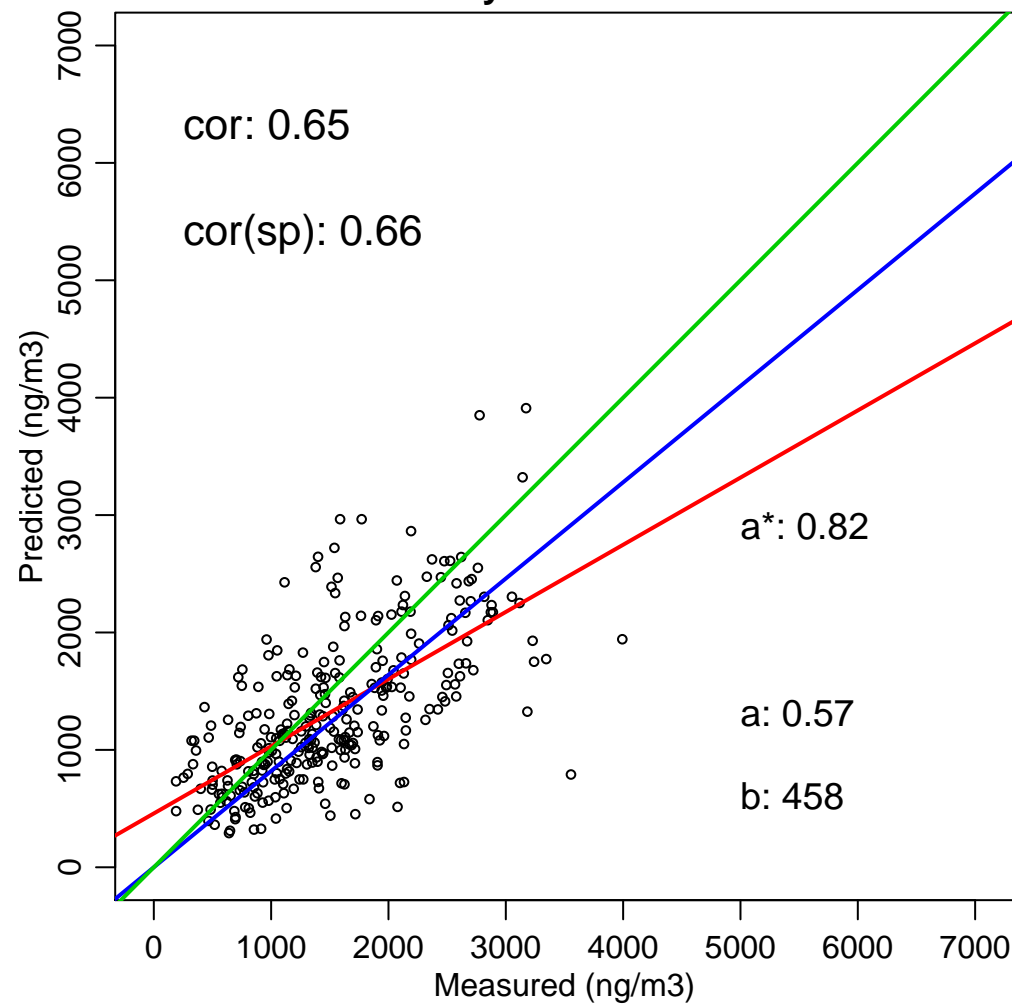

Supplement: s1 [file s1]

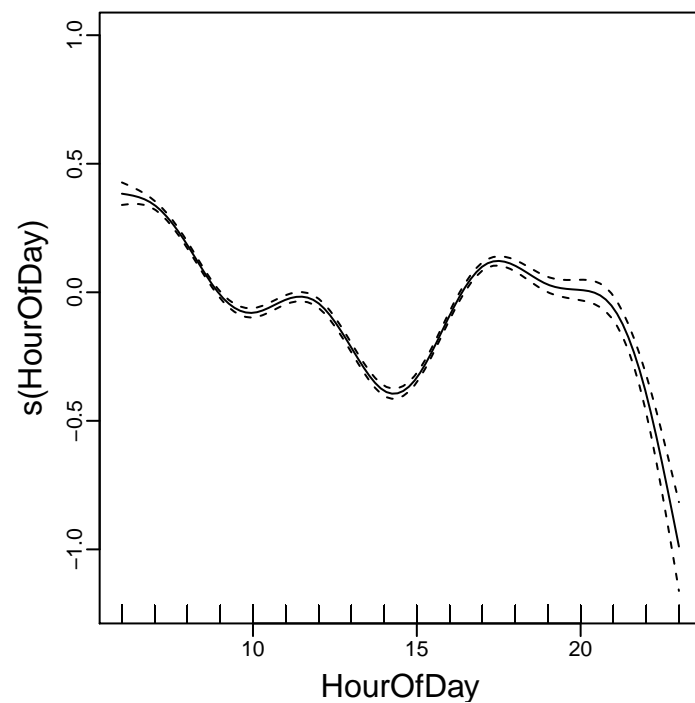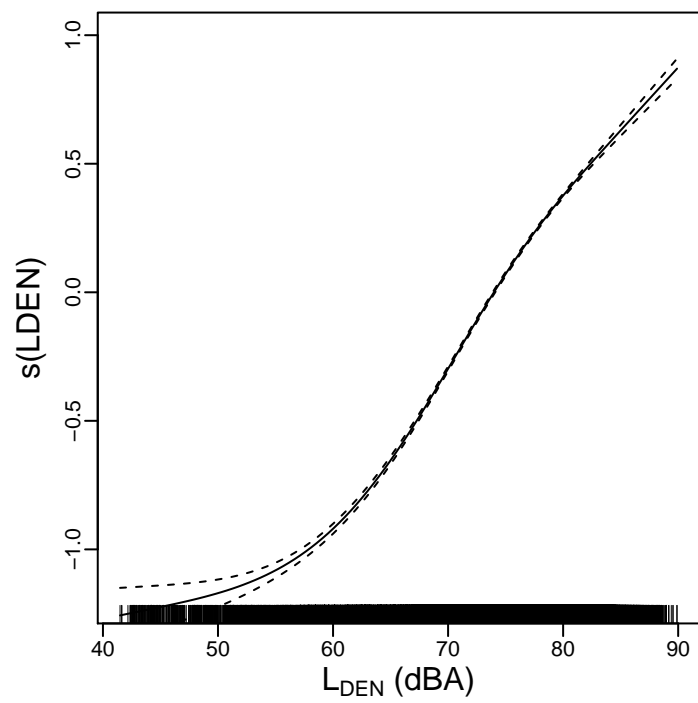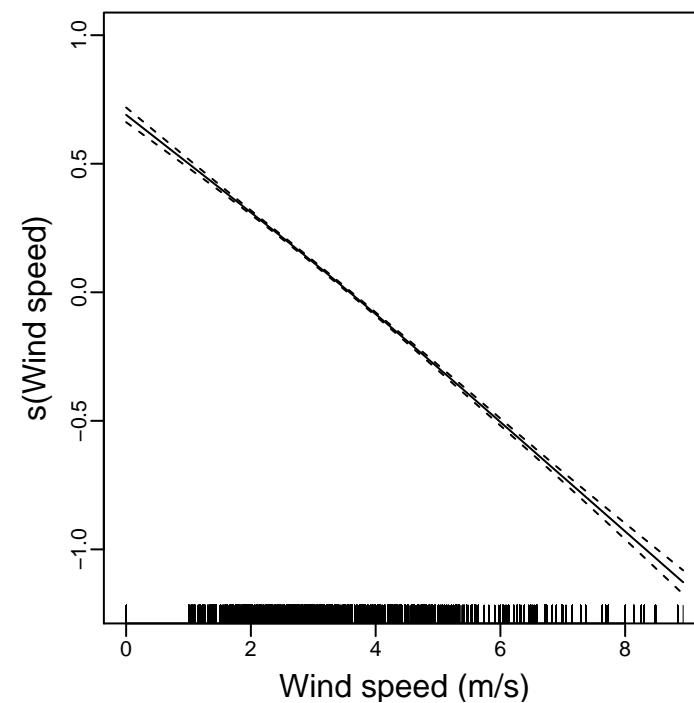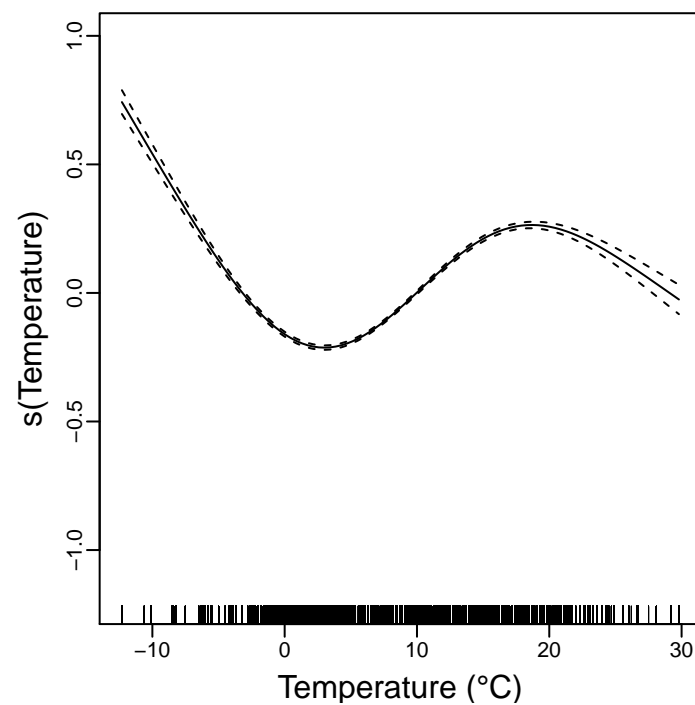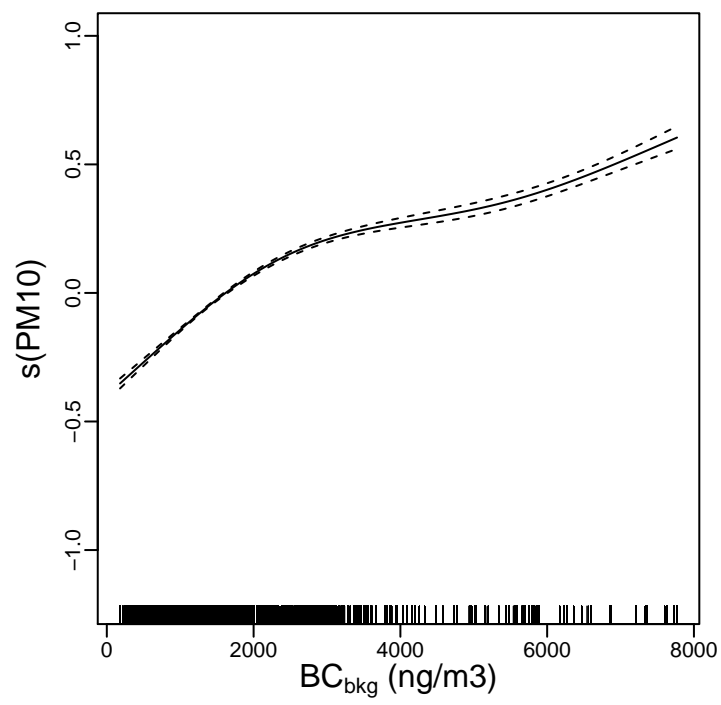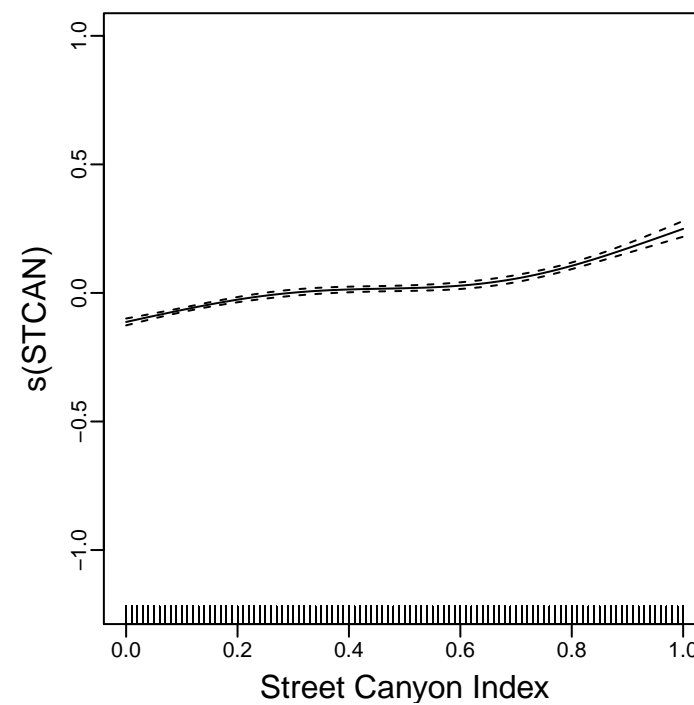

Supplement: s1 [file s1]

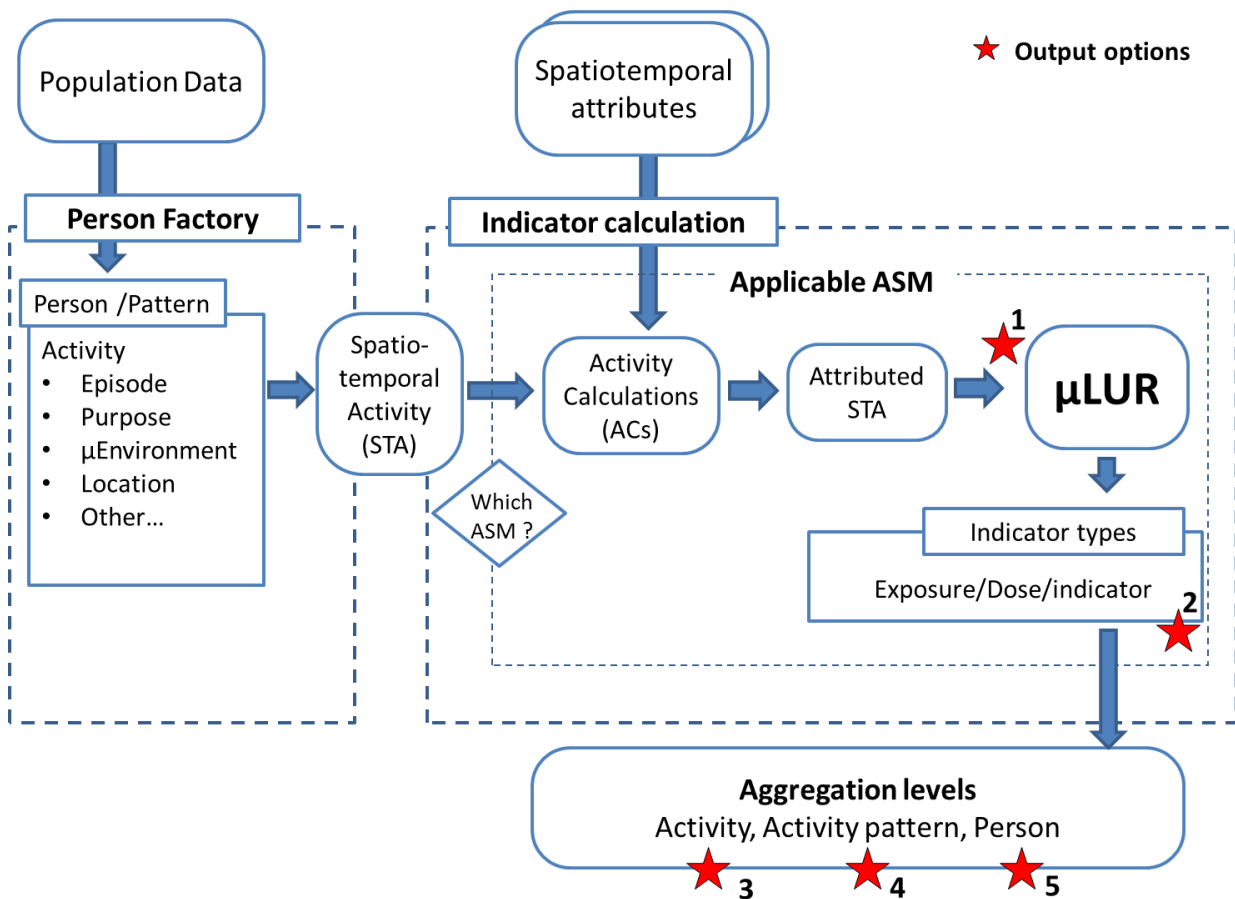

Supplement: s1 [file s1]

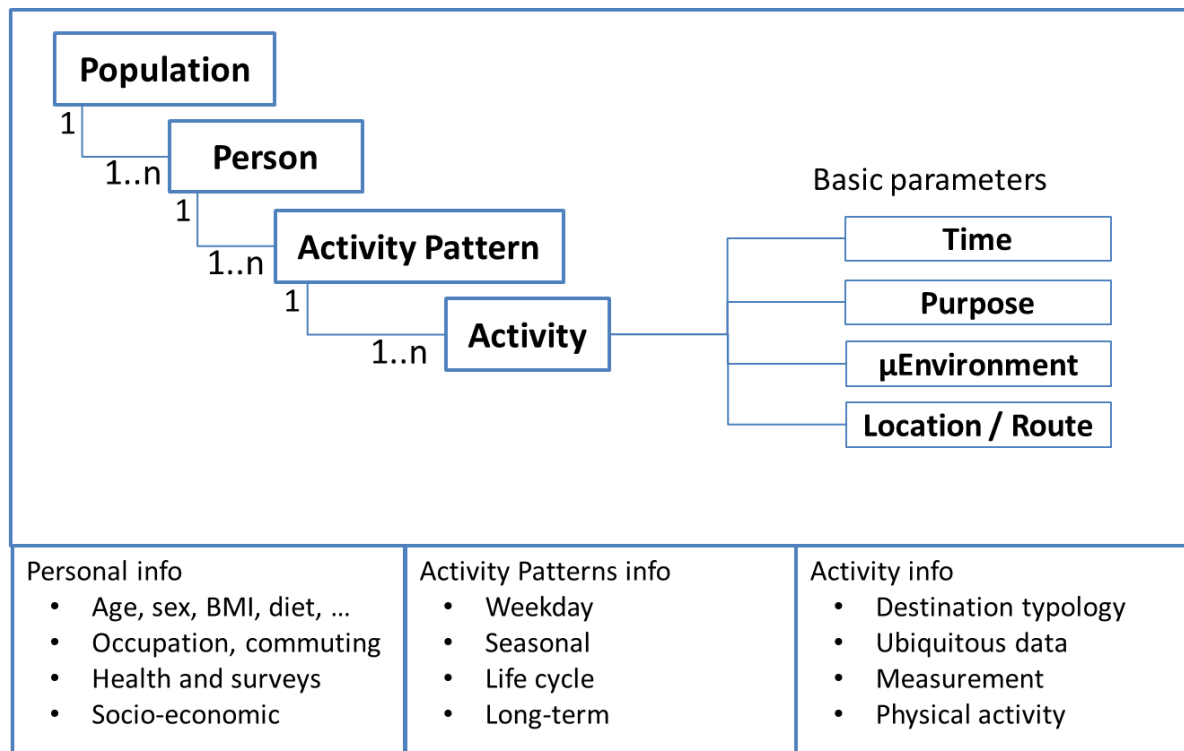

Supplement: s1 [file s1]

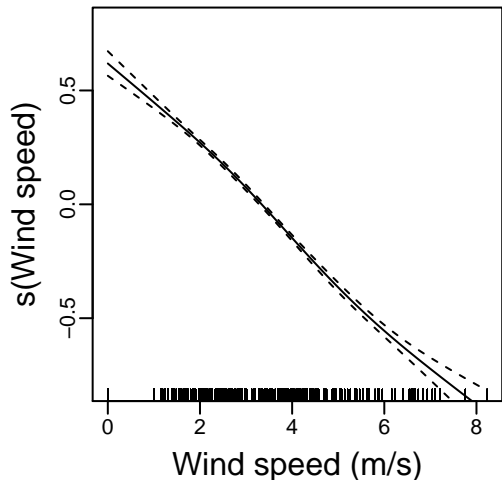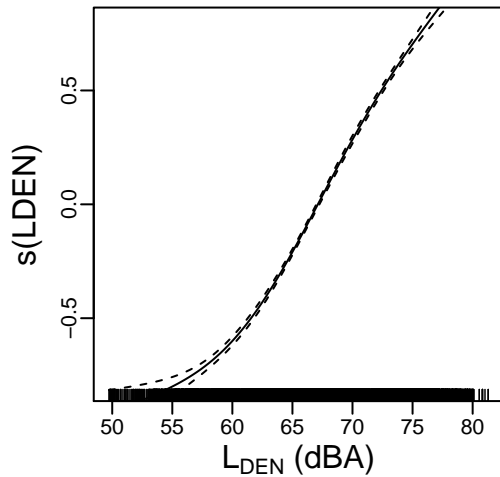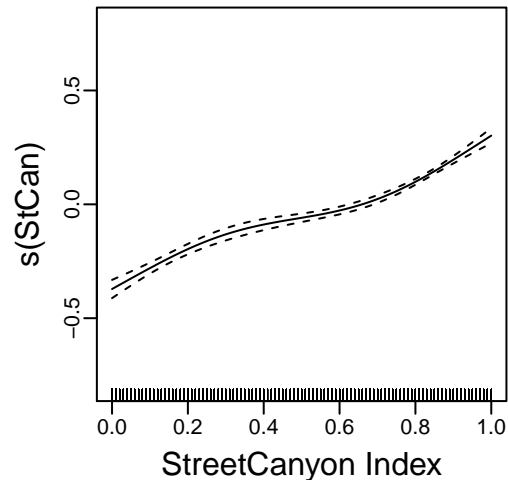

Supplement: s1 [file s1]

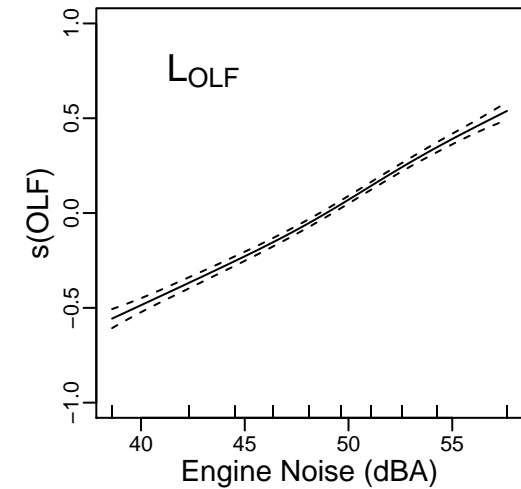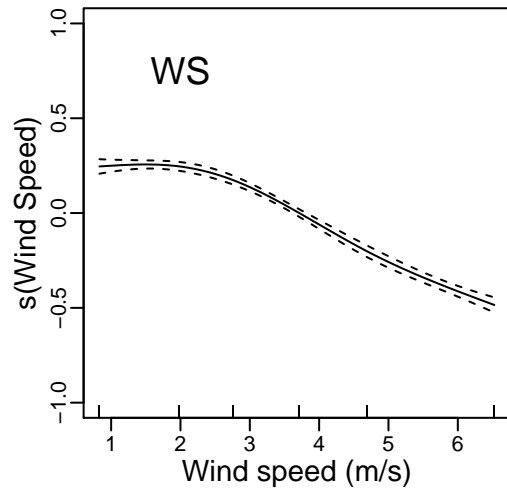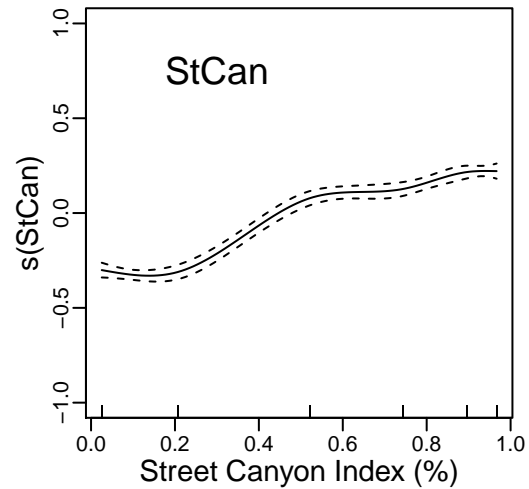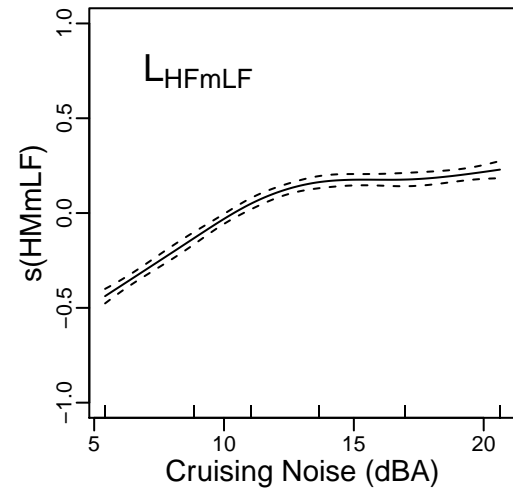

Supplement: s1 [file s1]

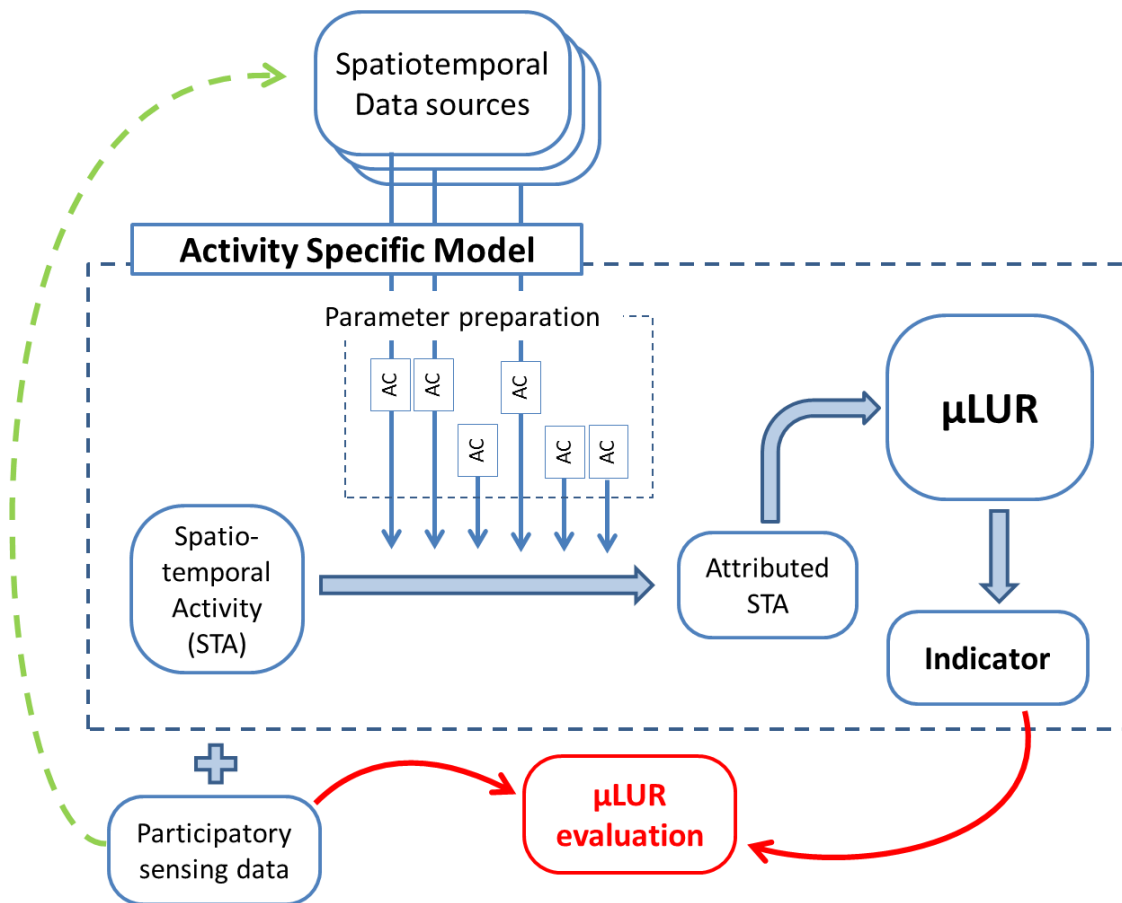

Supplement: s1 [file s1]
